# Supplementary material for: Exploring the electrostatic interaction mechanism of polyaspartic acid in improving the rejection of tetramethylammonium hydroxide by reverse osmosis membranes
Source: Royal Society of Chemistry journal article supplement (doi:10.1039/d3ew00444a), 2023-01-01
Supplement: d3ew00444a1.pdf [file d3ew00444a1.pdf]

## Supporting Information

### **Exploring the electrostatic interaction mechanism of polyaspartic acid in improving rejection of tetramethylammonium hydroxide by reverse osmosis membrane**

Xianfeng Li, Zhiwei Qiu, Tianlin Wang, Ruobin Dai,\* Zhichao Wu, and Zhiwei Wang

State Key Laboratory of Pollution Control and Resource Reuse, Shanghai Institute of Pollution Control and Ecological Security, Tongji Advanced Membrane Technology Center, School of Environmental Science and Engineering, Tongji University, Shanghai 200092, China

Submitted to: *Environmental Science: Water Research & Technology*

(September, 2023)

\* Corresponding authors: [dairuobin@tongji.edu.cn](mailto:dairuobin@tongji.edu.cn) (R. Dai).

**Calculation of the cross-linking degree of membranes:** the obtained atomic percent of O and N were used to calculate the ratio of oxygen to nitrogen (O/N) of the PA layer, which can be further used to determine its cross-linking degree. The O/N ratio of a fully aromatic polyamide is given by:<sup>1</sup>

$$r = \frac{O}{N} = \frac{3q + 4(1 - q)}{3q + 2(1 - q)} \quad (1)$$

Accordingly, the crosslinking degree  $q$  can be calculated from the measured O/N ratio by:<sup>2</sup>

$$q = \frac{4 - 2r}{1 + r} \times 100\% \quad (2)$$

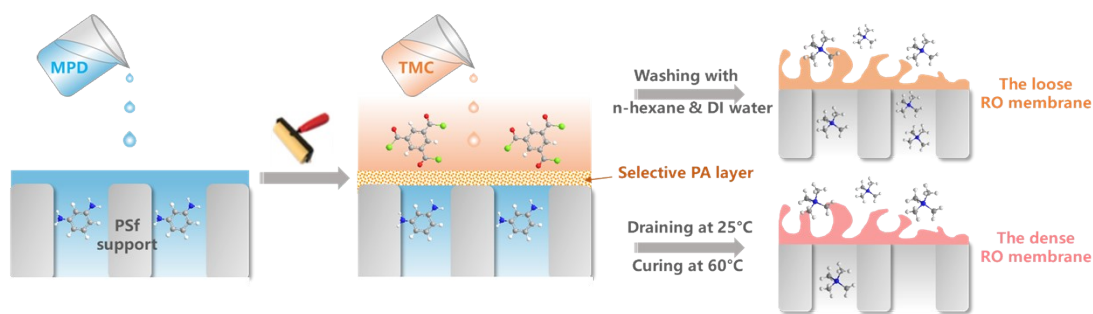

Figure S1. Fabrication process of the TFC PA RO membranes via IP.

Table S1. Water quality of microelectronic wastewater.

| Parameter          | Unit                    | Average values |
|--------------------|-------------------------|----------------|
| pH                 | —                       | 7              |
| Turbidity          | NTU                     | 33.7           |
| Conductivity       | $\mu\text{S}/\text{cm}$ | 447            |
| TOC                | mg/L                    | 370            |
| TMAH               | mg/L                    | 350            |
| $\text{Na}^+$      | mg/L                    | 126            |
| $\text{Cl}^-$      | mg/L                    | 141            |
| $\text{Ca}^{2+}$   | mg/L                    | 7              |
| $\text{Mg}^{2+}$   | mg/L                    | 1              |
| $\text{SO}_4^{2-}$ | mg/L                    | 161            |
| $\text{SiO}_2$     | mg/L                    | 0.107          |

Table S2. O/N ratio ( $r$ ) and crosslinking degree ( $q$ ) of loose and dense RO membranes.

| Membrane | O/N ratio       | Cross-linking degree |
|----------|-----------------|----------------------|
| Loose RO | $1.47 \pm 0.06$ | $43 \pm 6\%$         |
| Dense RO | $1.34 \pm 0.05$ | $56 \pm 6\%$         |

Independent-Samples T-Test,  $p < 0.05$  (both O/N ratios and cross-linking degrees).

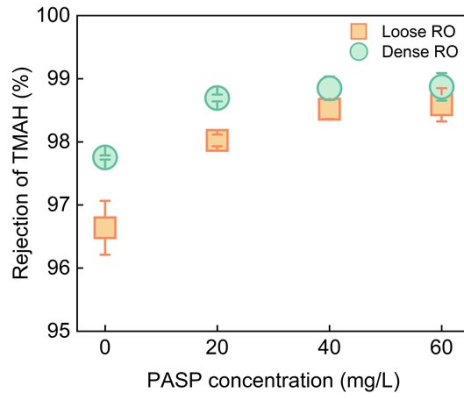

Figure S2. Rejection of TMAH with different PASP concentration.

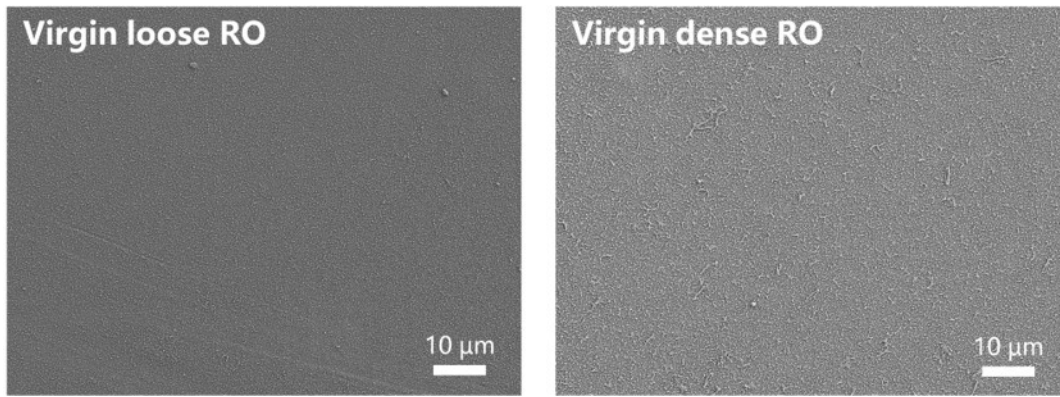

Figure S3. SEM micrographs of virgin loose RO membrane and dense RO membrane.

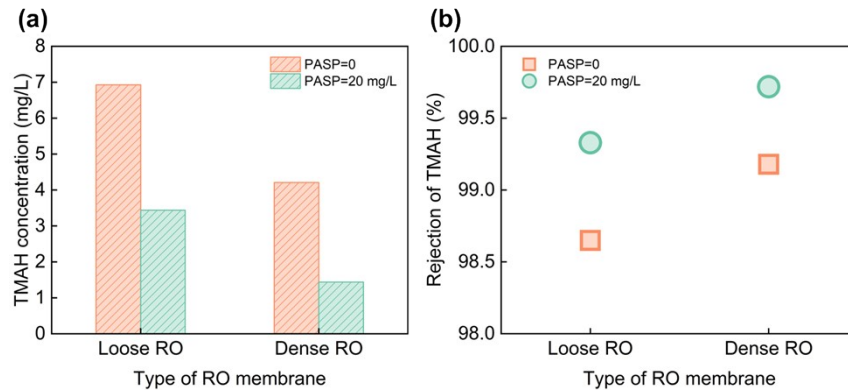

Fig. S4. PASP improves the rejection of TMAH in simulated microelectronic wastewater (containing  $\text{CaCl}_2$  and  $\text{Na}_2\text{SO}_4$ , the concentration of  $\text{CaCl}_2$  and  $\text{Na}_2\text{SO}_4$  were 21.4 mg/L and 390.2 mg/L, respectively). (a) TMAH concentration in effluent. (b) Rejection of TMAH.

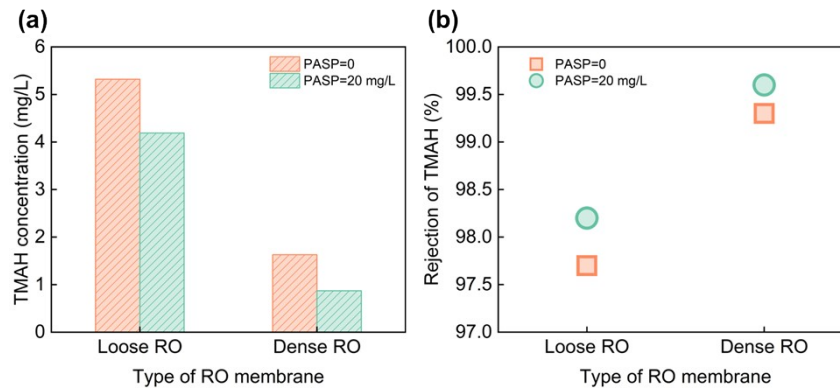

Fig. S5. PASP improves the rejection of TMAH in real microelectronic wastewater. (a) TMAH concentration in effluent. (b) Rejection of TMAH.

## Reference

1. Y. Liang, Y. Zhu, C. Liu, K. R. Lee, W. S. Hung, Z. Wang, Y. Li, M. Elimelech, J. Jin and S. Lin, Polyamide nanofiltration membrane with highly uniform sub-nanometre pores for sub-1 A precision separation, *Nat Commun*, 2020, **11**, 2015.
2. L. E. Peng, Z. Yao, X. Liu, B. Deng, H. Guo and C. Y. Tang, Tailoring Polyamide Rejection Layer with Aqueous Carbonate Chemistry for Enhanced Membrane Separation: Mechanistic Insights, Chemistry-Structure-Property Relationship, and Environmental Implications, *Environ Sci Technol*, 2019, **53**, 9764-9770.
